# Supplementary material for: Farming practices affect the amino acid profiles of the aquaculture Chinese mitten crab
Source: PeerJ. 2021 Jun 25;9:e11605. doi: 10.7717/peerj.11605 (PMC8237828; doi:10.7717/peerj.11605)
Supplement: Supplemental Information 1 — Amino acid composition, farming practices and crab specifications. [file peerj-09-11605-s001.xlsx]

## Sheet: Amino acid
Amino acid concentration (g 100g-1 of dry weight) of mitten crab in three tissues from each site and sex
Muscle	Suqian				Guannan				Sihong				Xinghua				Gaochun				Jintan				Suzhou
	♂		♀		♂		♀		♂		♀		♂		♀		♂		♀		♂		♀		♂		♀
Asp	6.82	7.16	7.1	7.5	7.25	7.29	7.2	7.4	6.61	6.77	7	7.08	6.9	7.3	7.18	7.28	7.4	7.48	7	7.4	7.29	7.35	7.22	7.26	7.13	7.19	7.03	7.07
Thr	3.4	3.54	3.52	3.6	3.49	3.55	3.47	3.55	3.2	3.28	3.39	3.47	3.41	3.51	3.55	3.57	3.71	3.77	3.48	3.54	3.57	3.61	3.57	3.63	3.5	3.54	3.5	3.58
Ser	2.6	3.2	2.9	2.94	2.88	2.94	2.88	2.94	2.7	2.76	2.81	2.89	2.88	2.9	2.92	2.98	3.15	3.21	2.83	2.87	3.06	3.1	2.96	3	2.91	3.01	2.93	2.97
Glu	10.56	11.14	10.82	10.86	10.4	11.1	10.55	11.15	10.42	10.48	10.66	10.7	10.91	10.99	10.77	10.89	12.08	12.14	10.9	10.94	11.6	11.7	11.24	11.3	12.03	12.09	11.4	11.44
Gly	4.43	4.95	4.61	4.73	4.82	5.2	4.67	5.31	5.15	5.23	5.1	5.16	5.1	5.14	4.5	4.7	4.52	4.6	4.03	4.07	5.3	5.36	4.74	4.78	5.2	5.28	5	5.06
Ala	6.5	6.54	6.42	6.48	6.92	7.1	6.34	6.62	7	7.4	7.28	7.36	6.44	6.5	7.3	7.44	6.57	6.65	6.1	6.14	6.52	6.56	6.25	6.35	6.22	6.34	6.1	6.16
Cys	1.21	1.33	1.22	1.36	1.2	1.34	1.3	1.4	1.22	1.32	1.4	1.42	1.32	1.36	1.25	1.37	1.1	1.16	1.33	1.39	1	1.02	1.37	1.39	1.18	1.26	1.1	1.16
Val	2.88	2.94	3.2	3.24	3.08	3.16	2.85	3.15	3	3.04	2.94	3.02	3.07	3.15	2.89	3.09	3.38	3.46	3.27	3.29	3.2	3.4	3.25	3.27	3.2	3.34	3.2	3.28
Met	2	2.1	2	2.18	1.92	2.06	1.79	1.97	1.8	1.86	1.83	1.95	2	2.2	2	2.06	1.99	2.07	1.83	1.85	1.88	1.94	1.84	1.92	1.83	1.89	1.85	1.95
Ile	3.11	3.19	3.21	3.31	3.2	3.3	3.13	3.25	3.02	3.04	3.14	3.18	3.04	3.08	3.13	3.19	3.5	3.54	3.32	3.36	3.38	3.44	3.35	3.41	3.22	3.34	3.22	3.26
Leu	5.28	5.34	5.5	5.52	5.37	5.49	5.44	5.48	5.1	5.12	5.2	5.28	5.3	5.36	5.42	5.48	6.05	6.07	5.64	5.72	5.78	5.84	5.7	5.78	5.6	5.62	5.6	5.66
Tyr	2.89	2.97	3	3.04	2.89	2.95	3.08	3.1	2.71	2.75	2.73	2.81	2.81	2.95	2.94	3.02	3.1	3.14	3.05	3.07	3.08	3.16	2.9	2.96	2.88	2.92	2.8	2.96
Phe	2.91	2.97	3	3.06	3.13	3.19	3.29	3.35	2.91	2.95	3.01	3.05	3.01	3.17	2.9	3.06	3.37	3.41	3.16	3.2	3.15	3.19	3.2	3.26	3.22	3.26	3.14	3.28
Lys	5.54	5.7	5.72	5.82	5.5	6.3	5.71	5.83	5.35	5.43	5.61	5.67	5.7	5.76	5.75	5.83	5.95	5.97	5.04	5.12	5.47	5.57	5.37	5.41	5.45	5.55	5.2	5.38
His	1.61	1.75	1.55	1.65	1.56	1.76	1.62	1.72	1.4	1.6	1.55	1.61	1.62	1.7	1.55	1.63	1.45	1.49	1.6	1.64	1.5	1.58	1.57	1.59	1.4	1.5	1.4	1.52
Arg	6.94	6.96	6.92	6.98	7.1	7.7	6.9	7	6.8	6.88	7.02	7.08	6.8	6.86	6.94	7.02	7.13	7.17	5.27	5.31	7.23	7.27	6.82	6.88	7.12	7.14	6.8	6.82
Pro	3.87	4.07	3.8	3.92	3.6	4.2	3.6	3.7	3.74	3.82	3.92	3.96	4.1	4.18	4	4.06	2.65	2.67	2.9	2.96	3.3	3.34	3.8	3.9	2.78	2.86	2.95	2.99
hepatopancreas	Suqian				Guannan				Sihong				Xinghua				Gaochun				Jintan				Suzhou
	♂		♀		♂		♀		♂		♀		♂		♀		♂		♀		♂		♀		♂		♀
Asp	0.93	1.29	0.91	0.97	1.32	1.34	1.22	1.28	0.97	1.05	1.13	1.21	0.84	0.88	1.04	1.1	1.22	1.26	0.93	0.95	1.11	1.19	0.92	0.96	1.37	1.45	1.01	1.11
Thr	0.54	0.62	0.44	0.52	0.71	0.81	0.65	0.71	0.56	0.62	0.66	0.68	0.44	0.5	0.53	0.57	0.68	0.76	0.52	0.58	0.64	0.66	0.48	0.56	0.73	0.75	0.54	0.64
Ser	0.44	0.46	0.33	0.41	0.5	0.58	0.45	0.55	0.44	0.48	0.43	0.57	0.33	0.37	0.4	0.46	0.54	0.58	0.4	0.44	0.46	0.54	0.35	0.45	0.5	0.68	0.44	0.5
Glu	1.22	1.26	1	1.16	1.6	1.64	1.5	1.54	1.25	1.27	1.36	1.46	1	1.06	1.14	1.26	1.54	1.6	1.12	1.2	1.37	1.39	1.1	1.12	1.56	1.7	1.25	1.33
Gly	0.59	0.71	0.42	0.56	0.74	0.82	0.64	0.72	0.57	0.67	0.65	0.73	0.43	0.45	0.55	0.57	0.62	0.7	0.5	0.56	0.64	0.68	0.45	0.53	0.73	0.81	0.54	0.6
Ala	0.8	0.86	0.5	0.6	1.03	1.15	0.82	0.96	0.85	0.89	0.83	0.91	0.5	0.54	0.74	0.8	0.85	0.95	0.67	0.75	0.8	0.84	0.6	0.66	1	1.08	0.7	0.76
Cys	0.18	0.24	0.16	0.18	0.2	0.26	0.2	0.28	0.2	0.26	0.26	0.32	0.13	0.21	0.14	0.22	0.33	0.35	0.18	0.22	0.19	0.27	0.15	0.21	0.34	0.4	0.21	0.25
Val	0.55	0.57	0.44	0.5	0.63	0.69	0.64	0.66	0.54	0.56	0.64	0.68	0.4	0.5	0.5	0.56	0.64	0.7	0.5	0.54	0.55	0.63	0.43	0.55	0.7	0.76	0.52	0.58
Met	0.24	0.28	0.18	0.26	0.29	0.31	0.25	0.33	0.22	0.28	0.27	0.35	0.17	0.23	0.22	0.28	0.24	0.3	0.2	0.26	0.23	0.29	0.2	0.22	0.3	0.36	0.21	0.27
Ile	0.47	0.51	0.38	0.4	0.51	0.61	0.48	0.56	0.41	0.49	0.45	0.53	0.3	0.4	0.41	0.47	0.5	0.58	0.38	0.46	0.46	0.5	0.37	0.41	0.58	0.62	0.43	0.47
Leu	0.8	0.86	0.66	0.68	0.94	1	0.87	0.93	0.9	0.68	0.84	0.9	0.57	0.65	0.7	0.82	0.95	0.97	0.73	0.75	0.8	0.86	0.65	0.67	1	1.02	0.8	0.82
Tyr	0.42	0.46	0.32	0.38	0.42	0.5	0.4	0.42	0.35	0.43	0.37	0.43	0.16	0.2	0.3	0.32	0.4	0.44	0.22	0.28	0.33	0.39	0.2	0.24	0.49	0.55	0.23	0.33
Phe	0.48	0.58	0.43	0.53	0.62	0.66	0.6	0.64	0.46	0.56	0.6	0.64	0.4	0.44	0.49	0.53	0.64	0.7	0.41	0.57	0.56	0.58	0.41	0.53	0.77	0.79	0.5	0.58
Lys	0.74	0.76	0.55	0.65	0.85	0.91	0.78	0.86	0.62	0.76	0.76	0.84	0.44	0.5	0.61	0.65	0.8	0.82	0.58	0.66	0.7	0.74	0.5	0.62	0.9	0.94	0.65	0.71
His	0.21	0.35	0.2	0.26	0.3	0.38	0.3	0.38	0.23	0.25	0.25	0.35	0.16	0.2	0.24	0.28	0.25	0.35	0.23	0.29	0.23	0.29	0.2	0.24	0.32	0.38	0.25	0.29
Arg	0.74	0.82	0.66	0.68	0.94	0.98	0.8	0.86	0.8	0.86	0.9	0.98	0.5	0.58	0.72	0.78	0.8	0.84	0.61	0.67	0.83	0.87	0.6	0.64	1	1.06	0.7	0.74
Pro	0.58	0.6	0.39	0.43	0.7	0.76	0.55	0.63	0.73	0.83	0.67	0.75	0.4	0.46	0.41	0.49	0.47	0.55	0.4	0.46	0.54	0.58	0.35	0.43	0.8	0.88	0.51	0.57
TAA	9.93	11.23	7.97	9.17	12.3	13.4	11.15	12.31	10.1	10.94	11.07	12.33	7.17	8.17	9.14	10.16	11.47	12.45	8.58	9.64	10.44	11.3	7.96	9.04	13.09	14.23	9.49	10.55
EAA	3.82	4.18	3.08	3.54	4.55	4.99	4.27	4.69	3.71	3.95	4.22	4.62	2.72	3.22	3.46	3.88	4.45	4.83	3.32	3.82	3.94	4.26	3.04	3.56	4.98	5.24	3.65	4.07
NEAA	6.11	7.05	4.89	5.63	7.75	8.41	6.88	7.62	6.39	6.99	6.85	7.71	4.45	4.95	5.68	6.28	7.02	7.62	5.26	5.82	6.5	7.04	4.92	5.48	8.11	8.99	5.84	6.48
DAA	3.54	4.12	2.83	3.29	4.69	4.95	4.18	4.5	3.64	3.88	3.97	4.31	2.77	2.93	3.47	3.73	4.23	4.51	3.22	3.46	3.92	4.1	3.07	3.27	4.66	5.04	3.5	3.8
EAA/TAA	0.384693	0.372217	0.386449	0.386041	0.369919	0.372388	0.38296	0.380991	0.367327	0.36106	0.38121	0.374696	0.379358	0.394125	0.378556	0.38189	0.387969	0.387952	0.386946	0.396266	0.377395	0.376991	0.38191	0.393805	0.380443	0.368236	0.384615	0.385782
gonad	Suqian				Guannan				Sihong				Xinghua				Gaochun				Jintan				Suzhou
	♂		♀		♂		♀		♂		♀		♂		♀		♂		♀		♂		♀		♂		♀
Asp	7.32	7.48	4.91	5.21	6.87	6.97	4.83	5.03	6.85	7.03	4.71	4.83	6.87	7.01	4.73	4.81	6.8	6.98	4.75	4.93	7.11	7.23	4.52	4.58	6.89	7.15	4.88	4.9
Thr	4.86	5.26	2.86	2.98	4.75	4.95	3.09	3.21	5.4	5.5	3.94	2.18	5.41	5.49	3.97	2.15	5.21	5.29	3.07	3.15	5.42	5.48	2.86	2.94	5.22	5.36	3.02	3.12
Ser	2.8	2.92	3.1	3.14	2.65	2.89	3.2	3.36	3	3.06	3.06	3.18	3.95	2.11	3.07	3.17	2.84	2.92	3.02	3.2	2.98	3.06	2.86	3.02	2.89	2.93	3.1	3.14
Glu	7.58	7.8	6.48	6.58	7.8	7.96	6.94	7.14	7.78	7.98	6.77	6.87	7.82	7.94	6.79	6.85	7.9	8.06	6.95	7.03	7.25	7.39	6.45	6.57	7.85	7.87	6.95	7.11
Gly	2.3	2.44	2.4	2.46	2.19	2.37	2.21	2.41	2.12	2.26	2.2	2.22	2.15	2.23	2.18	2.24	2.13	2.15	2.33	2.37	2.2	2.34	1.96	2.2	2.11	2.19	2.24	2.28
Ala	4.3	4.4	3.2	3.28	4.65	4.71	3.67	3.69	4.75	4.85	3.5	3.6	4.71	4.89	3.5	3.6	4.52	4.6	3.58	3.74	4.94	4.96	2.88	2.96	4.55	4.63	3.51	3.59
Cys	1.3	1.54	0.75	0.99	1.45	1.53	1	1.14	1.63	1.75	0.86	1	1.66	1.72	0.87	0.99	1.48	1.6	0.93	1.07	1.76	1.84	0.84	0.92	1.63	1.71	0.93	1.01
Val	1.87	2.09	2.85	3.13	2.05	2.21	3.27	3.33	1.94	2.04	3.11	3.29	1.96	2.02	3.13	3.27	2.08	2.14	3.22	3.36	2	2.12	2.98	3.16	1.89	2.01	3.22	3.34
Met	0.6	0.72	1.6	1.74	0.63	0.67	1.54	1.76	0.42	0.5	1.54	1.62	0.42	0.5	1.55	1.61	0.38	0.44	1.53	1.57	0.45	0.61	1.44	1.54	0.4	0.48	1.55	1.61
Ile	2.57	2.81	2.39	2.55	2.7	2.78	2.6	2.78	2.71	2.89	2.54	2.64	2.73	2.87	2.55	2.63	2.62	2.7	2.6	2.64	2.86	2.94	2.4	2.48	2.66	2.7	2.62	2.66
Leu	3.86	3.94	3.9	4.12	3.83	4.09	4.3	4.42	4	4.14	4.2	4.24	3.86	4.28	4.2	4.24	3.85	3.93	4.25	4.33	4.22	4.28	3.94	4.14	3.94	4	4.3	4.38
Tyr	1.8	1.92	2.21	2.33	1.95	2.21	2.37	2.45	1.71	1.87	2.21	2.27	1.77	1.81	2.2	2.28	1.72	1.78	2.3	2.36	1.97	2.13	1.94	2.04	1.77	1.83	2.11	2.25
Phe	2.21	2.27	2.57	2.69	2.2	2.22	2.54	2.76	1.89	2.27	2.47	2.55	2.03	2.13	2.46	2.56	1.93	1.97	2.49	2.55	2.23	2.29	2.36	2.46	1.95	2.07	2.45	2.49
Lys	2.86	3.1	3.46	3.58	2.84	2.92	3.4	3.48	2.57	2.63	3.19	3.31	2.55	2.65	3.21	3.29	2.74	2.86	3.32	3.38	2.7	2.84	3.14	3.18	2.62	2.68	3.46	3.5
His	1.3	1.36	0.95	1.19	1.34	1.38	0.87	1.29	1.28	1.36	0.93	1.11	1.27	1.37	1.94	0.1	1.42	1.58	1.13	1.15	1.58	1.66	1	1.1	1.43	1.51	1.1	1.12
Arg	2.57	2.71	3.74	4.04	2.66	2.78	3.76	3.9	2.3	2.4	3.68	3.84	2.3	2.4	3.71	3.81	2.28	2.36	3.62	3.66	2.35	2.49	3.47	3.57	2.23	2.33	3.7	3.8
Pro	7.86	8.04	2.2	2.24	6.41	6.47	2.26	2.36	7.66	7.7	2.28	2.44	7.62	7.74	2.33	2.39	7.33	7.41	2.44	2.5	8.16	8.26	2.39	2.45	7.55	7.65	2.5	2.6
TAA	57.96	60.8	49.57	52.25	56.97	59.11	51.85	54.51	58.01	60.23	51.19	51.19	59.08	59.16	52.39	49.99	57.23	58.77	51.53	52.99	60.18	61.92	47.43	49.31	57.58	59.1	51.64	52.9
EAA	18.83	20.19	19.63	20.79	19	19.84	20.74	21.74	18.93	19.97	20.99	19.83	18.96	19.94	21.07	19.75	18.81	19.33	20.48	20.98	19.88	20.56	19.12	19.9	18.68	19.3	20.62	21.1
NEAA	39.13	40.61	29.94	31.46	37.97	39.27	31.11	32.77	39.08	40.26	30.2	31.36	40.12	39.22	31.32	30.24	38.42	39.44	31.05	32.01	40.3	41.36	28.31	29.41	38.9	39.8	31.02	31.8
DAA	21.5	22.12	16.99	17.53	21.51	22.01	17.65	18.27	21.5	22.12	17.18	17.52	21.55	22.07	17.2	17.5	21.35	21.79	17.61	18.07	21.5	21.92	15.81	16.31	21.4	21.84	17.58	17.88
EAA/TAA	0.324879	0.332072	0.396006	0.397895	0.333509	0.335645	0.4	0.398826	0.326323	0.331562	0.410041	0.38738	0.320921	0.337052	0.402176	0.395079	0.328674	0.328909	0.397438	0.395924	0.330342	0.332041	0.40312	0.403569	0.324418	0.326565	0.399303	0.398866

## Sheet: Farming practice
		SQ	GN	SH	XH	GC	JT	SZ
	Commercial feeds(х103 kg ha-1)	1.845	1.425	2.8125	1.512	1.125	2.085	3.786
	Trash fish(х103 kg ha-1)	2.205	2.025	0.621	0.219	5.82	10.725	4.755
	Maize seed(х103 kg ha-1)	1.0875	0.4875	1.125	0.2535	2.25	0.9825	0.3525
	Soybean(х103 kg ha-1)	0.3345	0	0.045	0	0.8625	0	0.117
	Ratio of weight of trash fish to the total feeds(%)	40	51	13	11	58	78	53
		SQ	GN	SH	XH	GC	JT	SZ
	Snail supply(х103 kg ha-1)	1.9125	2.79	0	2.295	10.35	12	2.6325
	Macrophyte coverage(%)	70	50	67.5	45	66.7	62.5	70
		SQ	GN	SH	XH	GC	JT	SZ
	Yield(х103 kg ha-1)	1.3875	1.0125	2.175	1.338	1.6875	2.7375	1.5
	Individual size at harvest(g)	100	120	90	110	140	150	125
		SQ	GN	SH	XH	GC	JT	SZ
	Pond size(ha)	3.26667	20	1.06667	8.53333	1.04667	1	5.46667
	Stocking density(х104 ha-1)	2.2875	1.65	2.925	1.5	1.8	2.325	2.1
		Pond size	Stocking density	Yield	Number at harvest	Individual size at harvest	Macrophyte coverage	Snali supply	Commercial feeds	Trash fish	Maize seed	Soybean	Ratio of weight of trash fish to the total feeds(%)
		ha	х104 ha-1	х103 kg ha-1	х104 ha-1	g	%	х103 kg ha-1	х103 kg ha-1	х103 kg ha-1	х103 kg ha-1	х103 kg ha-1	%
SQ	1	2.66667	2.1	1.5	1.36	110.294	75	2.25	1.875	1.875	1.5	0.375	33.3333
	2	3.73333	2.25	1.5	1.59	94.3396	90	3.75	1.875	1.05	1.35	0.33	22.8013
	3	4	1.8	1.05	1.244	84.4051	60	0.525	2.13	0.495	0.75	0.12	14.1631
	4	2.66667	3	1.5	1.35	111.111	55	1.125	1.5	5.4	0.75	0.51	66.1765
GN	1	13.3333	1.8	1.125	0.87	129.31	40	2.25	1.35	2.09	0.51	0	52.9114
	2	26.6667	1.5	0.9	0.81	111.111	60	3.33	1.51	1.96	0.47	0	49.7462
SH	1	1.33333	3.3	2.1	2.85	73.6842	80	0	2.625	0.417	1.125	0.05	9.88855
	2	0.8	2.55	2.25	2.1	107.143	55	0	3	0.825	1.13	0.04	16.5165
XH	1	10.6667	1.8	1.338	1.43	93.5664	45	2.25	1.21	0.23	0.105	0	14.8867
	2	6.4	1.2	1.338	1.056	126.705	45	2.34	1.81	0.21	0.401	0	8.6741
GC	1	1.46667	1.65	1.5	1.11	135.135	70	8.55	1.13	5.83	2.3	0.89	57.4384
	2	0.68	1.8	1.875	1.19	157.563	60	7.5	0.75	6.24	1.45	0.5	69.7987
	3	1	1.95	1.67	1.31	127.481	70	15	1.5	5.4	3	1.2	48.6486
JT	1	0.8	2.25	2.625	1.72	152.616	65	12	2.505	9.195	1.125	0	71.6959
	2	1.2	2.4	2.85	1.93	147.668	60	12	1.665	12.255	0.84	0	83.0285
SZ	1	6.66667	2.4	1.8	1.44	125	70	2.925	3.12	6.585	0.36	0.11	64.7174
	2	4.26667	1.8	1.2	0.954	125.786	70	2.34	4.452	2.925	0.34	0.13	37.2754

## Sheet: Crab specifications
	SQ		Body weight(g)	Hepatopancreas weight(g)	Gonad weight(g)	Muscle weight(g)	CW(cm)	CL(cm)		HIS%	GSI%	GH ratio	CF
	♂	1	130.4	11.1	3.2	17.2	6	5.4		8.51227	2.45399	0.288288	0.828126
	♂	2	144.7	13.2	4.3	21.2	6.7	6.2		9.12232	2.97167	0.325758	0.607146
	♂	3	122.2	9.1	4	16.8	6.2	5.9		7.44681	3.27332	0.43956	0.594998
	♂	4	132.2	9.6	4.4	18.9	6.1	5.4		7.26172	3.32829	0.458333	0.839557
	♂	5	147.2	12.9	4	22.2	6.8	6.3		8.76359	2.71739	0.310078	0.588689
		Average	135.34	11.18	3.98	19.26	6.36	5.84		8.22134	2.94893	0.364403	0.691703
		SE	4.66444	0.831817	0.21019	1.07295	0.160997	0.192302		0.37	0.16	0.03	0.0581378
	♀	1	94.8	7	7.5	15	5.8	5.4		7.38397	7.91139	1.07143	0.602042
	♀	2	86	7	7.4	12.6	5.8	5.2		8.13953	8.60465	1.05714	0.611629
	♀	3	132.2	10.8	11	26.5	6.7	6.4		8.16944	8.32073	1.01852	0.504303
	♀	4	96.8	9.8	8.5	12.7	5.9	5.5		10.124	8.78099	0.867347	0.581818
	♀	5	112.5	8.5	9.5	18.7	6.3	6		7.55556	8.44444	1.11765	0.520833
		Average	104.46	8.62	8.78	17.1	6.1	5.7		8.27449	8.41244	1.02642	0.564125
		SE	8.14376	0.755791	0.675293	2.59831	0.174413	0.219135		0.49	0.15	0.0402492	0.02
	GN		Body weight(g)	Hepatopancreas weight(g)	Gonad weight(g)	Muscle weight(g)	CW(cm)	CL(cm)		HIS%	GSI%	GH ratio	CF
	♂	1	123.4	11.3	3.4	18.6	6.4	5.9		9.15721	2.75527	0.300885	0.60084
	♂	2	135.7	9.8	2.2	20.8	6.5	6.2		7.22181	1.62122	0.22449	0.569383
	♂	3	148.6	11.7	3.9	20.8	6.7	6.2		7.87349	2.6245	0.333333	0.62351
	♂	4	142.1	11.8	4	17	6.6	6.1		8.30401	2.81492	0.338983	0.626044
		Average	137.45	11.15	3.375	19.3	6.55	6.1		8.13913	2.45398	0.299423	0.604944
		SE	5.37285	0.462781	0.413068	0.925563	0.0645497	0.0707107		0.406743	0.280398	0.0271953	0.0132288
	♀	1	66.8	7.5	4.1	8.2	5.4	5.1		11.2275	6.13772	0.546667	0.503577
	♀	2	77	7	7.9	15.1	5.6	5.3		9.09091	10.2597	1.12857	0.517205
	♀	3	75.6	6.3	7.2	11.8	5.6	5.3		8.33333	9.52381	1.14286	0.507802
	♀	4	74.1	6.7	7.2	10.9	5.5	5.3		9.04184	9.7166	1.07463	0.497726
		Average	73.375	6.875	6.6	11.5	5.525	5.25		9.42341	8.90947	0.973181	0.506578
		SE	2.27	0.255	0.845	1.425	0.045	0.05		0.63	0.93	0.14	0.004
	SH		Body weight(g)	Hepatopancreas weight(g)	Gonad weight(g)	Muscle weight(g)	CW(cm)	CL(cm)		HIS%	GSI%	GH ratio	CF
	♂	1	134.4	9.1	3.3	19.9	6.4	6		6.77083	2.45536	0.362637	0.622222
	♂	2	145	12.5	5.4	21	6.65	6.2		8.62069	3.72414	0.432	0.608405
	♂	3	133.7	10.6	4.4	20	6.5	6		7.9282	3.29095	0.415094	0.618981
	♂	4	117.1	8.1	2.9	20.3	6.1	5.7		6.91716	2.47652	0.358025	0.632313
	♂	5	114.6	7.6	3	17.2	6.2	5.9		6.63176	2.6178	0.394737	0.557993
		Average	128.96	9.58	3.8	19.68	6.37	5.96		7.37373	2.91295	0.392499	0.607983
		SE	5.72881	0.889955	0.478519	0.64846	0.098387	0.0804984		0.39	0.25	0.0134164	0.0134164
	♀	1	87.9	5.3	7.6	16.3	5.7	5.5		6.02958	8.64619	1.43396	0.528325
	♀	2	94.5	5.8	8.4	17.7	5.9	5.6		6.13757	8.88889	1.44828	0.538106
	♀	3	97.5	7.9	9.7	16.1	6.2	5.9		8.10256	9.94872	1.22785	0.474732
	♀	4	101.1	8.2	7.7	16.7	6.1	5.8		8.11078	7.61622	0.939024	0.518164
	♀	5	106.1	7	9.9	19.7	6.5	5.8		6.59755	9.33082	1.41429	0.54379
		Average	97.42	6.84	8.66	17.3	6.08	5.72		6.99561	8.88617	1.29268	0.520623
		SE	3.06341	0.567961	0.487463	0.661876	0.134164	0.0715542		0.46	0.39	0.098387	0.0134164
	XH		Body weight(g)	Hepatopancreas weight(g)	Gonad weight(g)	Muscle weight(g)	CW(cm)	CL(cm)		HIS%	GSI%	GH ratio	CF
	♂	1	154.1	12.3	4.7	20.3	6.4	6.1		7.98183	3.04997	0.382114	0.678911
	♂	2	157.7	13.9	4.6	24.4	6.6	6.1		8.8142	2.91693	0.330935	0.694772
	♂	3	155	13.3	4	16.4	6.9	6.2		8.58065	2.58065	0.300752	0.650364
	♂	4	148.9	11.7	5.6	18.9	6.7	6.2		7.85762	3.76091	0.478632	0.624769
	♂	5	160.6	16.2	4.1	24.7	6.9	6.5		10.0872	2.55293	0.253086	0.584797
		Average	155.26	13.48	4.6	20.94	6.7	6.22		8.66429	2.97228	0.349104	0.646723
		SE	1.95432	0.778152	0.286217	1.60102	0.0939149	0.0715542		0.4	0.22	0.0402492	0.0178885
	♀	1	83.4	8.5	7.1	16.3	5.9	5.5		10.1918	8.51319	0.835294	0.501277
	♀	2	75.1	6.4	7.1	10.4	5.5	5.3		8.52197	9.45406	1.10937	0.504443
	♀	3	80.7	7.9	7.3	13.8	5.7	5.3		9.78934	9.04585	0.924051	0.542058
	♀	4	84.5	6.4	7.9	11.2	5.5	5.4		7.57396	9.34911	1.23438	0.536631
	♀	5	81	7.7	6.7	13.9	5.8	5.4		9.50617	8.2716	0.87013	0.514403
		Average	80.94	7.38	7.22	13.12	5.68	5.38		9.11666	8.92676	0.994645	0.519763
		SE	1.62786	0.420381	0.196774	1.05542	0.0804984	0.0357771		0.47	0.23	0.0760263	0.00894427
	GC		Body weight(g)	Hepatopancreas weight(g)	Gonad weight(g)	Muscle weight(g)	CW(cm)	CL(cm)		HIS%	GSI%	GH ratio	CF
	♂	1	163.4	11.1118	3.70392	35.3	7.5	6.9		6.80035	2.26678	0.333333	0.497399
	♂	2	152.2	9.72707	2.47945	28.7	6.8	6.3		6.39098	1.62907	0.254902	0.608686
	♂	3	160.6	12.3275	3.93795	33.1	7.1	6.5		7.67591	2.45203	0.319444	0.584797
	♂	4	155.8	8.23612	2.91696	30.9	6.9	6.3		5.28634	1.87225	0.354167	0.623083
	♂	5	124.7	8.83827	3.21392	25.2	6.3	5.5		7.08763	2.57732	0.363636	0.749512
		Average	151.34	10.0481	3.25044	30.64	6.92	6.3		6.64824	2.15949	0.325097	0.612695
		SE	6.93	0.75	0.26	1.75	0.19	0.23		0.4	0.18	0.019	0.04
	♀	1	135.2	11.5784	17.7149	21.6	6.5	6.3		8.5639	13.1028	1.53	0.540698
	♀	2	100.2	7.19385	7.91323	17	5.6	5.3		7.17949	7.89744	1.1	0.673039
	♀	3	141.5	13.6506	19.6568	22.4	6.7	6.6		9.64706	13.8918	1.44	0.492181
	♀	4	137	9.05508	15.122	17.4	6.6	6.4		6.60955	11.0379	1.67	0.522614
	♀	5	103.1	9.5434	12.7882	18.8	5.6	5.4		9.25645	12.4036	1.34	0.654753
		Average	123.4	10.2043	14.639	19.44	6.2	6		8.25129	11.6667	1.416	0.576657
		SE	8.95	1.11	2.05	1.1	0.25	0.27		0.59	1.05	0.09	0.04
	JT		Body weight(g)	Hepatopancreas weight(g)	Gonad weight(g)	Muscle weight(g)	CW(cm)	CL(cm)		HIS%	GSI%	GH ratio	CF
	♂	1	213	15.7	6.7	47	7.5	7.1		7.37089	3.14554	0.426752	0.59512
	♂	2	197.5	13.5	6.6	45.3	7.4	6.9		6.83544	3.34177	0.488889	0.601201
	♂	3	201.5	13.4	5	40.6	7.4	6.8		6.65012	2.48139	0.373134	0.640838
	♂	4	183.9	16.8	5	37.8	7.4	6.8		9.1354	2.71887	0.297619	0.584864
	♂	5	197.2	15.6	3.3	44.6	7.4	6.9		7.91075	1.67343	0.211538	0.600288
		Average	198.62	15	5.32	43.06	7.42	6.9		7.58052	2.6722	0.359586	0.604462
		SE	4.66444	0.666348	0.621627	1.68152	0.0223607	0.0536656		0.45	0.29	0.0491935	0.00894427
	♀	1	132.2	9.4	11.4	23.2	6.6	6.4		7.11044	8.6233	1.21277	0.504303
	♀	2	126.9	10	14.7	23.8	6.7	6.5		7.88022	11.5839	1.47	0.462085
	♀	3	123.3	9.5	14.1	19.8	6.45	6.35		7.70479	11.4355	1.48421	0.481551
	♀	4	114.9	8.4	13.3	19.2	6.4	6.2		7.3107	11.5753	1.58333	0.482109
	♀	5	128.1	8	15	20.7	6.6	6.1		6.24512	11.7096	1.875	0.564364
		Average	125.08	9.06	13.7	21.34	6.55	6.31		7.25025	10.9855	1.52506	0.498882
		SE	2.91583	0.371187	0.643988	0.916788	0.0536656	0.0715542		0.28	0.59	0.102859	0.0178885
	SZ		Body weight(g)	Hepatopancreas weight(g)	Gonad weight(g)	Muscle weight(g)	CW(cm)	CL(cm)		HIS%	GSI%	GH ratio	CF
	♂	1	136	9.5	4.6	30.7	6.6	6.1		6.98529	3.38235	0.484211	0.599169
	♂	2	145.7	8.7	4.5	23	6.6	6.2		5.97117	3.08854	0.517241	0.611342
	♂	3	163.5	11.1	2.9	32.2	6.9	6.5		6.78899	1.7737	0.261261	0.595357
	♂	4	140.4	11.2	1.5	21.7	6.6	6.3		7.97721	1.06838	0.133929	0.561494
	♂	5	152.6	8.6	5.7	25.4	6.6	6.2		5.63565	3.73526	0.662791	0.640294
		Average	147.64	9.82	3.84	26.6	6.66	6.26		6.67166	2.60964	0.411886	0.601531
		SE	4.83438	0.567961	0.737902	2.07954	0.0581378	0.067082		0.41	0.51	0.0939149	0.0134164
	♀	1	100.3	6.8	9.3	19.6	6.2	5.8		6.77966	9.27218	1.36765	0.514064
	♀	2	99.1	6.4	10.5	14.2	6	5.8		6.45812	10.5954	1.64063	0.507913
	♀	3	118.5	8	12.4	21.4	6.5	6.1		6.75105	10.4641	1.55	0.52207
	♀	4	98.2	8.2	9.6	17.9	6.1	5.5		8.35031	9.77597	1.17073	0.590233
	♀	5	101.8	7.1	11.5	14.4	6.2	5.9		6.97446	11.2967	1.61972	0.495669
		Average	103.58	7.3	10.66	17.5	6.2	5.82		7.06272	10.2809	1.46974	0.52599
		SE	3.77895	0.344354	0.581378	1.41767	0.0849706	0.098387		0.33	0.35	0.0894427	0.0178885

## Sheet: Composition in feed
Main composition in trash fish and commercial pellet feed of mitten crab (%)
			Crude protein	Crude fat	Ash
Trash fish		1	63.8	14.1	15.2
		2	64.9	13.2	16.1
		3	63.9	13.5	15.5
Commercial pellet feed		1	41.5	10.2	11
		2	43.1	9.5	11.6
		3	43.2	9.8	11.4
